# Supplementary material for: The solution structure of the amino-terminal domain of human DNA polymerase ε subunit B is homologous to C-domains of AAA+ proteins
Source: PubMed Central journal article supplement — Nucleic Acids Res. 2008 Aug 2;36(15):5102–10. doi: 10.1093/nar/gkn497 (PMC2528186; doi:10.1093/nar/gkn497), 2008-08-02
Supplement: gkn497_1.pdf [file gkn497_1.pdf]

**Supplementary figure 1. Purification and physicochemical characterization of the recombinant 6xHis-tagged amino-terminal domain of human Pol  $\epsilon$  B subunit (6xHis-Dpoe2NT).** A, Recombinant 6xHis-Dpoe2NT was purified by  $\text{Ni}^{2+}$ -chelating chromatography, analyzed and visualized by SDS-PAGE and Coomassie blue staining. B, Far UV CD spectrum of recombinant 6xHis-Dpoe2NT at 20°C in 5 mM potassium phosphate, pH 8.2. C, Temperature titration curve of recombinant 6xHis-Dpoe2NT followed by CD spectroscopy at 222 nm. The scan from 25 to 98°C is presented as a bold line, the reverse scan from 98 to 25°C as a thin line.

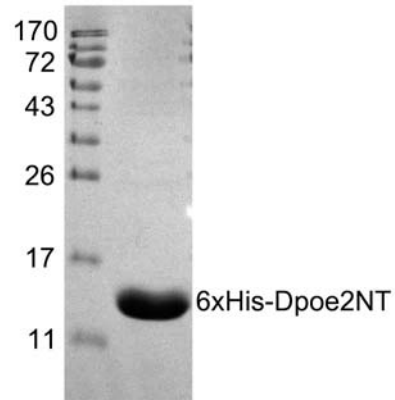

Nuutinen et al. Supplementary Fig. 1A

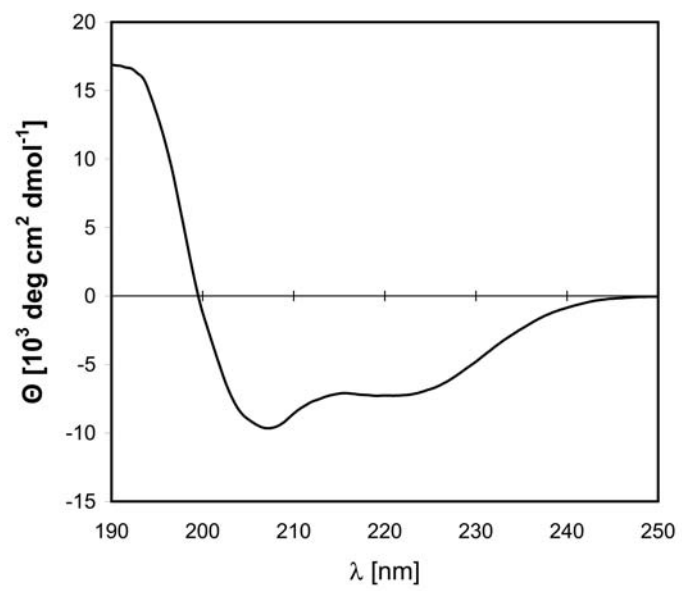

Nuutinen et al. Supplementary figure 1B

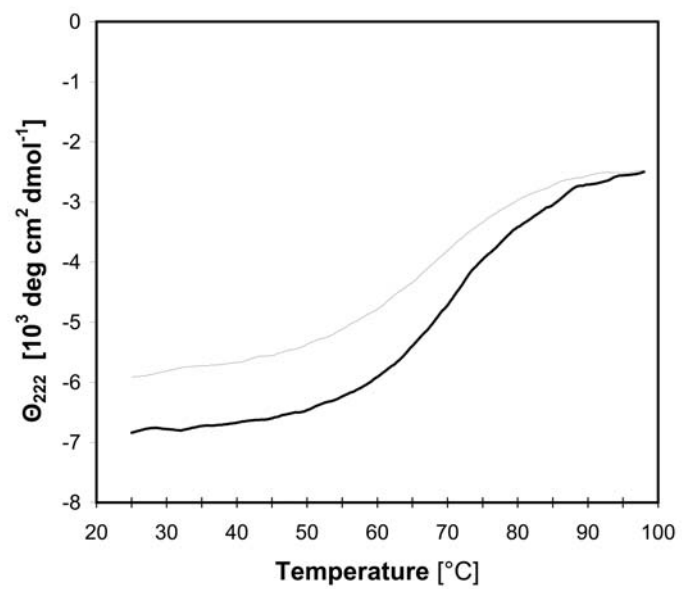

Nuutinen et al. Supplementary figure 1C
